# Supplementary material for: Ketoacidosis at Diabetes Onset Is Still Frequent in Children and Adolescents
Source: Oxford University Press journal article supplement (doi:10.2337/dc09-0553), 2009-06-23
Supplement: dc090553-sup-dka_brief_report_institutions_05-2009.doc [file dc090553-sup-dka_brief_report_institutions_05-2009.doc]

**Participating institutions**

Aachen: Uni-Kinderklinik RWT, Aalen: Kinderklinik, Ahlen: St. Franziskus Kinderklinik, Altötting: Zentrum Inn-Salzach, Arnsberg-Hüsten: Karolinenhospital, Aue: Helios Kinderklink, Augsburg: Kinderklinik, Aurich: Kinderklinik, Bad Hersfeld: Kinderklinik, Bad Oeynhausen: Diabetesfachklinik, Bautzen: Oberlausitz Kinderklinik, Berlin: DRK-Kliniken, Berlin: Kinderklinik Lindenhof, Bielefeld: Kinderklinik Gilead, Bocholt: Kinderklinik, Bochum: Universitätskinderklinik,Bonn: Uni-Kinderklinik, Bottrop: Kinderklinik, Bremen: Kinderklinik Nord, Bremen: Kinderklinik St.Jürgens, Bremerhaven: Kinderklinik, Celle: Kinderklinik, Chemnitz: Kinderklinik, Coesfeld: Kinderklinik, Darmstadt: Kinderklinik Prinzessin Margaret, Datteln: Vestische Kinderklinik, Deggendorf: Kinderklinik, Detmold: Kinderklinik, Dornbirn: Kinderklinik, Dortmund: Kinderklinik, Dresden: Neustadt Kinderklinik, Dresden: Uni-Kinderklinik, Düren-Birkesdorf: Kinderklinik, Düsseldorf: Uni-Kinderklinik, Erfurt: Kinderklinik, Erlangen: Uni-Kinderklinik, Essen: Elisabeth Kinderklinik, Essen: Uni-Kinderklinik, Esslingen: Städtische Kinderklinik, Eutin: Kinderklinik, Freiburg: Uni-Kinderklinik, Friedrichshafen: Kinderklinik, Fulda: Kinderklinik, Fürth: Kinderklinik, Garmisch-Partenkirchen: Kinderklinik, Gelnhausen: Kinderklinik, Gelsenkirchen: Kinderklinik, Gießen: Uni-Kinderklinik, Graz: Universitäts-Kinderklinik, Göppingen: Kinderklinik am Eichert, Görlitz: Städtische Kinderklinik, Göttingen: Uni-Kinderklinik, Hagen: Kinderklinik, Halle: Uni-Kinderklinik, Hamburg: Altonaer Kinderklinik, Hamburg: Kinderklinik Wilhelmstift, Hamburg-Nord: Kinderklinik, Hamm: Kinderklinik, Hanau: Kinderklinik, Hannover: Kinderklinik MHH, Hannover: Kinderklinik auf der Bult, Heidelberg: Uni-Kinderklinik, Heidenheim: Kinderklinik, Heilbronn: Kinderklinik, Herdecke: Kinderklinik, Herford: Klinikum für Kinder & Jugendliche, Hildesheim: Kinderklinik, Hof: Kinderklinik, Homburg: Uni-Kinderklinik Saarland, Innsbruck: Universitätskinderklinik, Itzehoe: Kinderklinik, Jena: Uni-Kinderklinik, Kaiserslautern: Westpfalzklinik, Karlsruhe: Städtische Kinderklinik, Kassel: Kinderklinik Park Schönfeld, Kassel: Städtische Kinderklinik, Kiel: Städtische Kinderklinik, Kiel: Universitäts-Kinderklinik, Kirchen: DRK Klinikum Westerwald, Koblenz: Kinderklinik Kemperhof, Konstanz: Kinderklinik, Krefeld: Kinderklinik, Köln: Kinderklinik Amsterdamerstraße, Köln: Uni-Kinderklinik, Landshut: Kinderklink, Leipzig: Uni-Kinderklinik, Leverkusen: Kinderklinik, Lingen: Kinderklinik St. Bonifazius, Linz: Kinderklinik, Lippstadt: Evangelische Kinderklinik, Ludwigsburg: Kinderklinik, Ludwigshafen: Kinderklinik St.Anna-Stift, Lübeck: Uni-Kinderklinik, Lüdenscheid: Kinderklinik, Magdeburg: Uni-Kinderklinik, Mainz: Uni-Kinderklinik, Mannheim: Uni-Kinderklinik, Marburg: Uni-Kinderklinik, Mechernich: Kinderklinik, Memmingen Kinderklinik, Merzig Kinderklinik, Minden: Kinderklinik, Moers: Kinderklinik, Mutterstadt: Kinderarztpraxis, Mönchengladbach: Kinderklinik, München: von Haunersche Kinderklinik, München-Harlaching: Kinderklinik, Münster: St. Franziskus Kinderklinik, Münster: Uni-Kinderklinik, Neuburg: Kinderklinik, Neunkirchen: Marienhausklinik, Neuss: Lukaskrankenhaus Kinderklinik, Neuwied: Kinderklinik Elisabeth, Nürnberg: Cnopfsche Kinderklinik, Nürnberg: Zentrum für Neugeborene, Kinder und Jigendliche, Oberhausen: Kinderklinik, Offenbach/Main: Kinderklinik, Offenburg: Kinderklinik, Oldenburg: Kinderklinik, Osnabrück: Kinderklinik, Paderborn: St. Vincenz Kinderklinik, Papenburg: Marienkrankenhaus,Passau: Kinderklinik, Pforzheim: Kinderklinik, Ravensburg: Kinderklink St. Nikolaus, Regensburg: Kinderklinik St. Hedwig, Remscheid: Kinderklinik, Rendsburg: Kinderklinik, Reutlingen: Kinderarztpraxis, Rheine: Mathiasspital Kinderklinik, Rosenheim: Kinderklinik, Rostock: Uni-Kinderklinik, Rotenburg/Wümme: Kinderklinik, Rüsselsheim: Kinderklinik, Saalfeld: Thüringen-Klinik Kinderklinik, Saarbrücken: Kinderklinik Winte, Saarlouis: Kinderklinik, Schw. Gmünd: Margaritenhospital, Schweinfurt: Kinderklinik, Schwerin: Kinderklinik, Schwäbisch Hall: Diakonie-Krankenhaus, Singen: Kinderklinik, Singen: Hegauklinik Kinderklinik, Stade: Kinderklinik, Stolberg: Kinderklinik, Stuttgart: Olgahospital Kinderklinik, Suhl: Kinderklinik, Trier: Kinderklinik, Tübingen: Uni-Kinderklinik, Ulm: Uni-Kinderklinik, Vechta: Kinderklinik, Viersen: Kinderklinik, Waiblingen: Kinderklinik, Weiden: Kinderklinik, Wien: Uni-Kinderklinik, Wiesbaden: Horst-Schmidt-Kinderklinik, Wiesbaden: Kinderklinik DKD, Wilhelmshafen: Reinhard-Nieter-Krankenhaus, Worms: Kinderklinik, Wuppertal: Kinderklinik.
